# Supplementary material for: SARS-CoV-2 NSP13 interacts with TEAD to suppress Hippo-YAP signaling
Source: eLife journal article supplement (doi:10.7554/elife.100248), 2024-08-21
Supplement: fig3-data6 [file Figure 3F.pdf › Figure 3F.pdf]

| Year | 1990 | 1991 | 1992 | 1993 | 1994 | 1995 | 1996 | 1997 | 1998 |
|------|------|------|------|------|------|------|------|------|------|
| 1990 | 1990 | 1991 | 1992 | 1993 | 1994 | 1995 | 1996 | 1997 | 1998 |

Control YAP 5SA +NSP13 +R567A +Q88H +D260Y +E341D +R392C +P419S +M429I
