# Supplementary material for: SARS-CoV-2 NSP13 interacts with TEAD to suppress Hippo-YAP signaling
Source: eLife journal article supplement (doi:10.7554/elife.100248), 2024-08-21
Supplement: fig4-data4 [file Figure 4C.pdf › Figure 4C.pdf]

IP

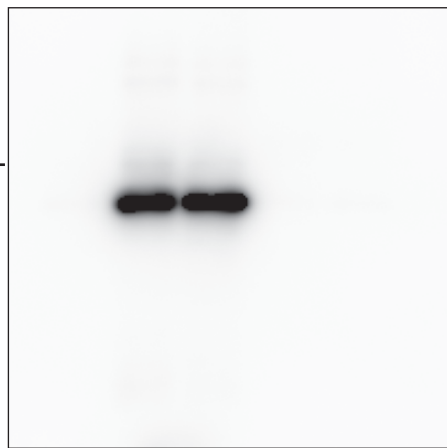

← Myc-TEAD4

← HA-NSP13

← Flag-YAP WT

HA-NSP13  
Flag-YAP WT+HA-NSP13  
Myc-TEAD4+Flag-YAP WT  
Myc-TEAD4  
Myc-TEAD4

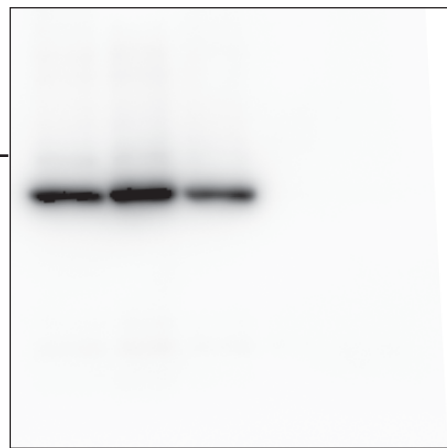

← Myc-TEAD4

← HA-NSP13

← Flag-YAP WT

HA-NSP13  
Flag-YAP WT+HA-NSP13  
Myc-TEAD4+Flag-YAP WT  
Myc-TEAD4  
Myc-TEAD4
