# Supplementary material for: SARS-CoV-2 NSP13 interacts with TEAD to suppress Hippo-YAP signaling
Source: eLife journal article supplement (doi:10.7554/elife.100248), 2024-08-21
Supplement: fig4-figsupp7-data2 [file sFigure 5B.pdf › sFigure 5B.pdf]

sFigure 5B

HA-NSP13

|                         |   |   |   |   |   |   |   |   |   |
|-------------------------|---|---|---|---|---|---|---|---|---|
| Vector                  | + | + | + | + | + | + | + | + | + |
| Myc-TEAD4 1-434 (48 kd) |   |   |   |   |   |   |   |   |   |
| Myc-TEAD4 1-129         |   |   |   |   |   |   |   |   |   |
| Myc-TEAD4 130-434       |   |   |   |   |   |   |   |   |   |
| Myc-CCT3 (60 kd)        |   |   |   |   |   |   |   |   |   |
| Myc-SMARCD1 (58 kd)     |   |   |   |   |   |   |   |   |   |
| Myc-EIF4A1 (46 kd)      |   |   |   |   |   |   |   |   |   |
| Myc-LMNA (74 kd)        |   |   |   |   |   |   |   |   |   |
| Myc-TTF2 (72 kd)        |   |   |   |   |   |   |   |   |   |
| Myc-YY2 (42 kd)         |   |   |   |   |   |   |   |   |   |

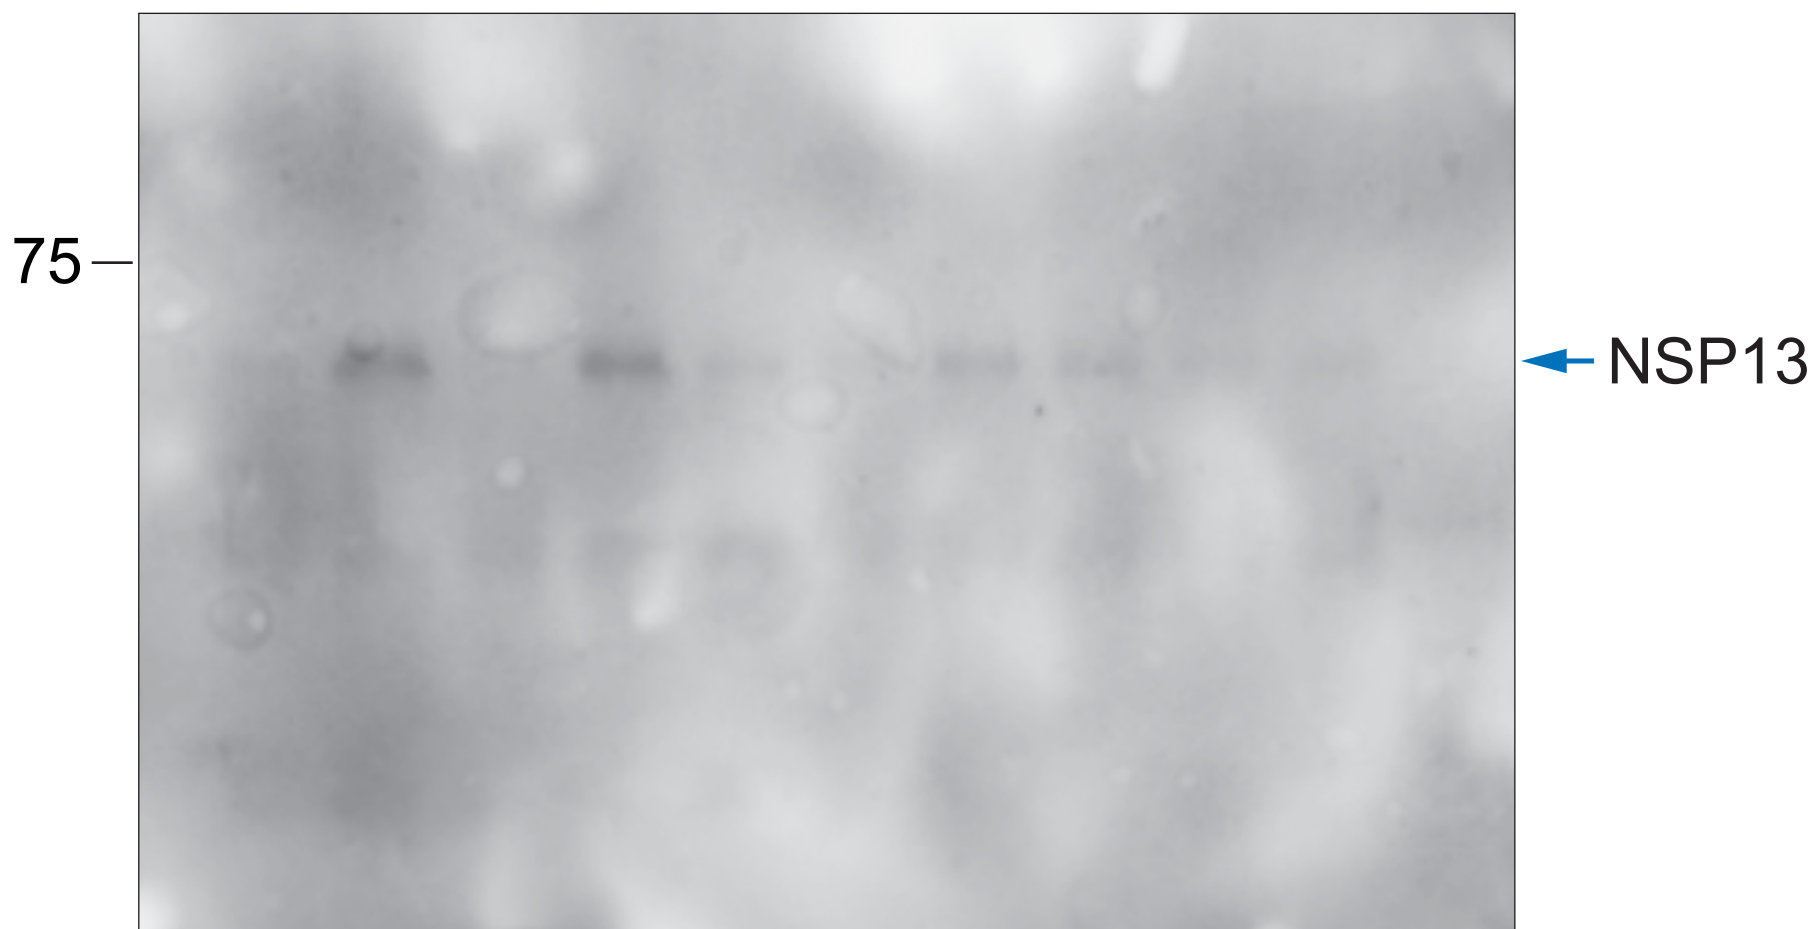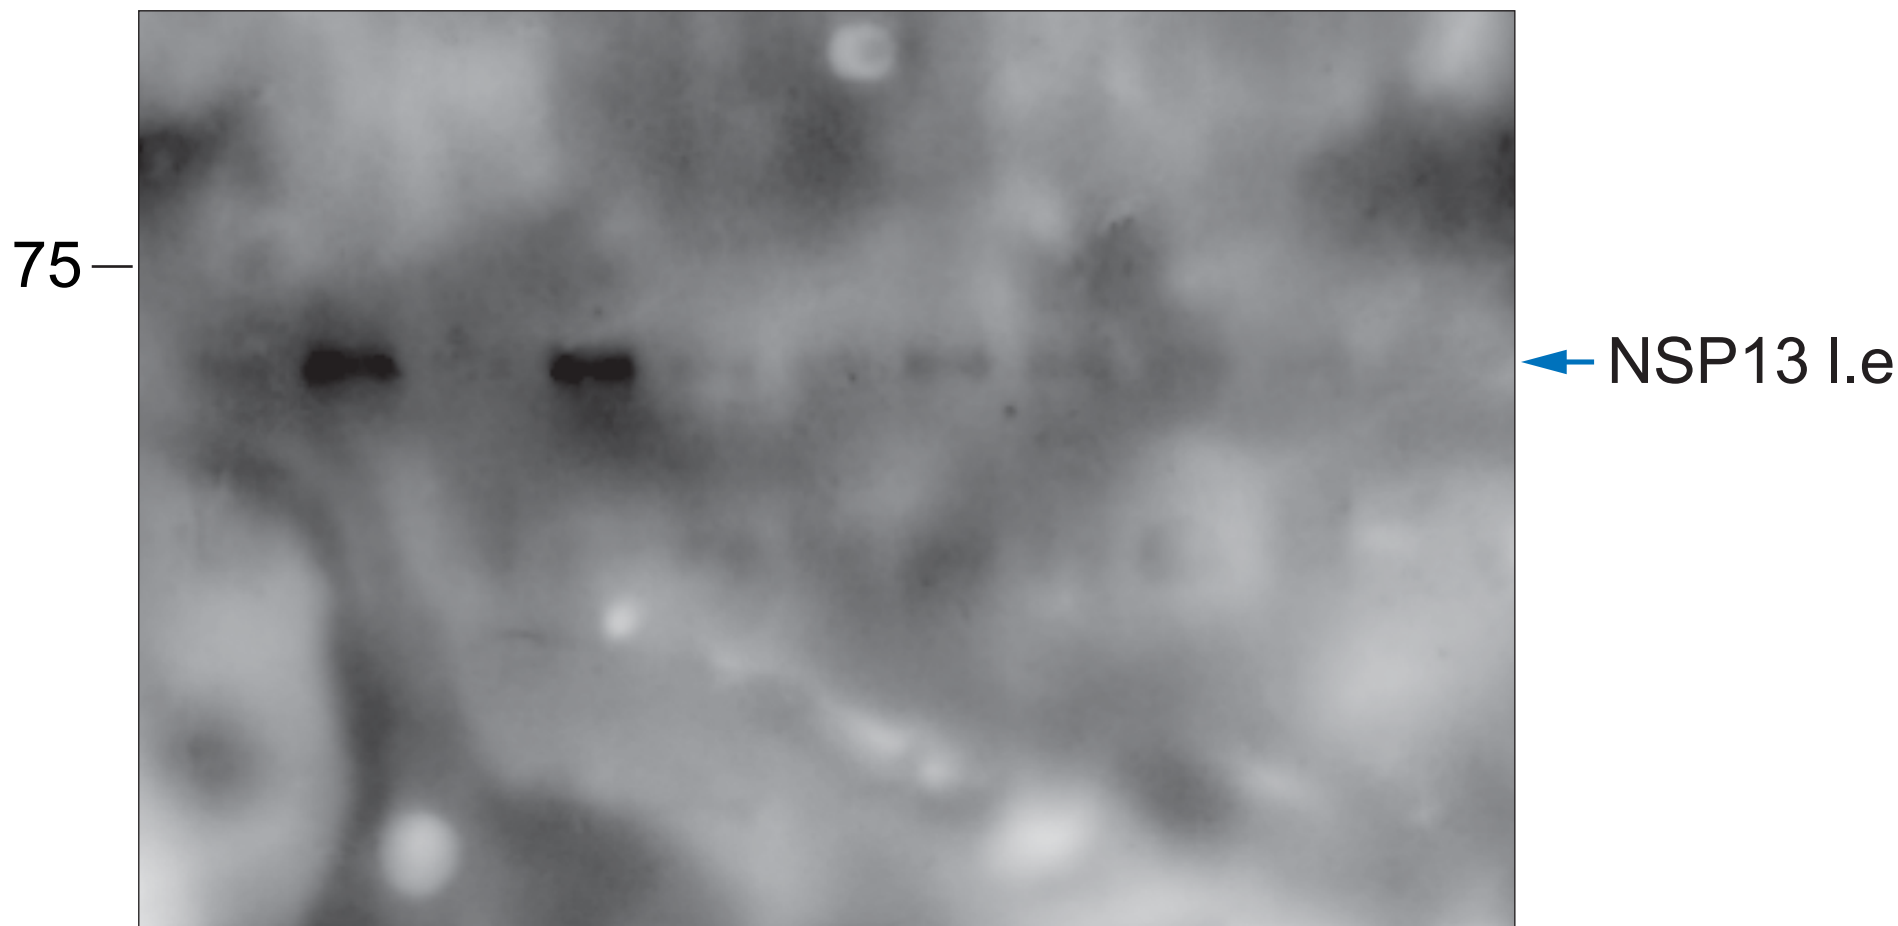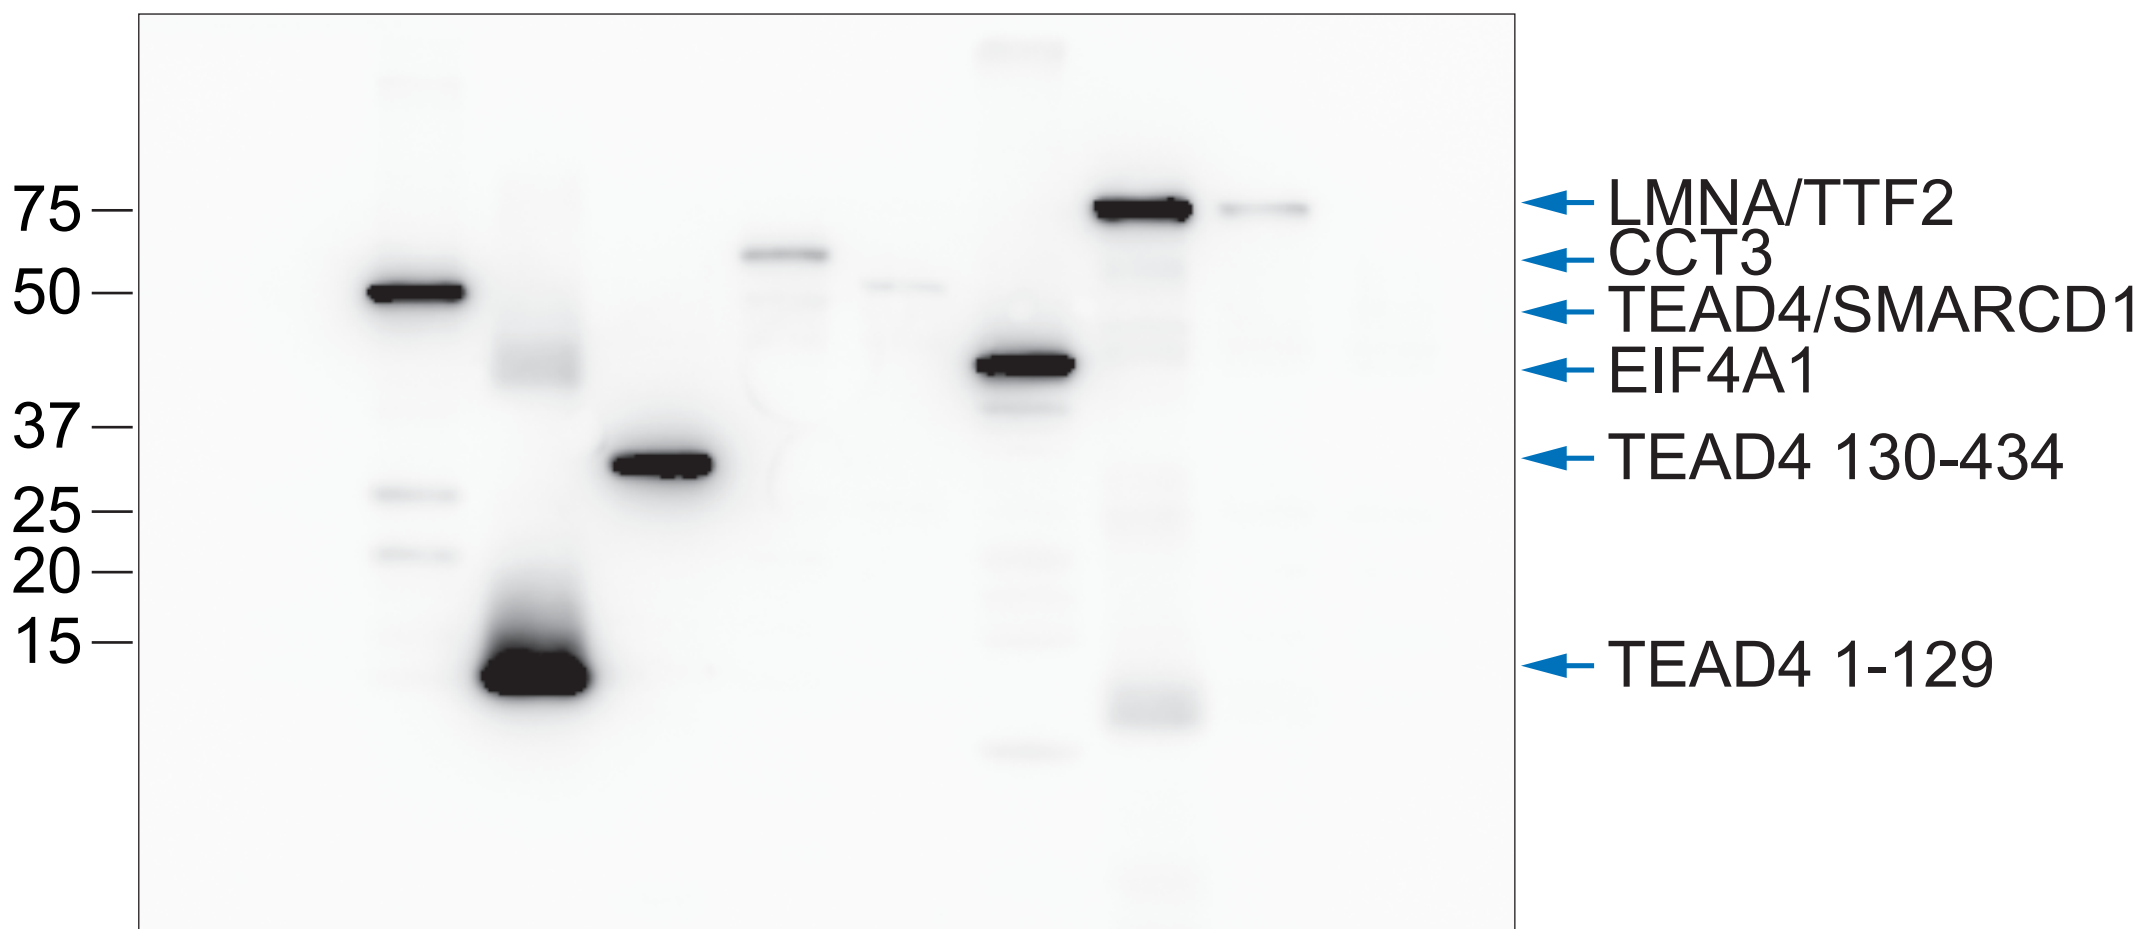

HA-NSP13

|                         |   |   |   |   |   |   |   |   |   |
|-------------------------|---|---|---|---|---|---|---|---|---|
| Vector                  | + | + | + | + | + | + | + | + | + |
| Myc-TEAD4 1-434 (48 kd) |   |   |   |   |   |   |   |   |   |
| Myc-TEAD4 1-129         |   |   |   |   |   |   |   |   |   |
| Myc-TEAD4 130-434       |   |   |   |   |   |   |   |   |   |
| Myc-CCT3 (60 kd)        |   |   |   |   |   |   |   |   |   |
| Myc-SMARCD1 (58 kd)     |   |   |   |   |   |   |   |   |   |
| Myc-EIF4A1 (46 kd)      |   |   |   |   |   |   |   |   |   |
| Myc-LMNA (74 kd)        |   |   |   |   |   |   |   |   |   |
| Myc-TTF2 (72 kd)        |   |   |   |   |   |   |   |   |   |
| Myc-YY2 (42 kd)         |   |   |   |   |   |   |   |   |   |

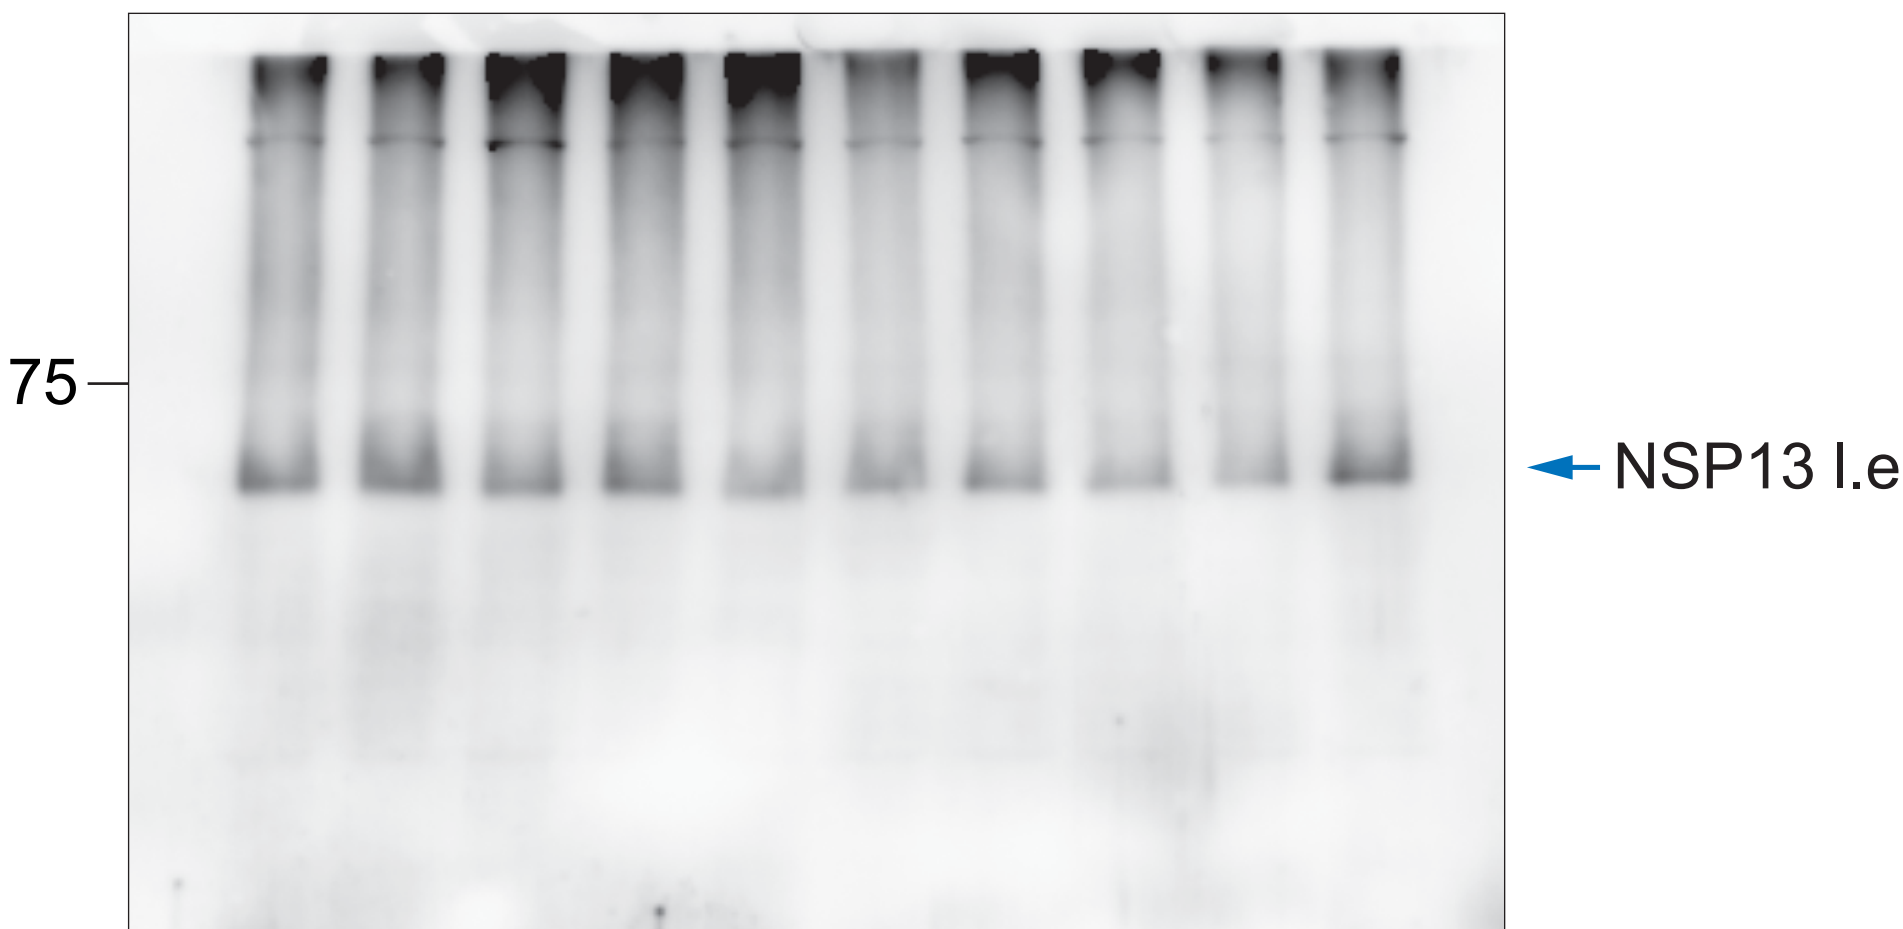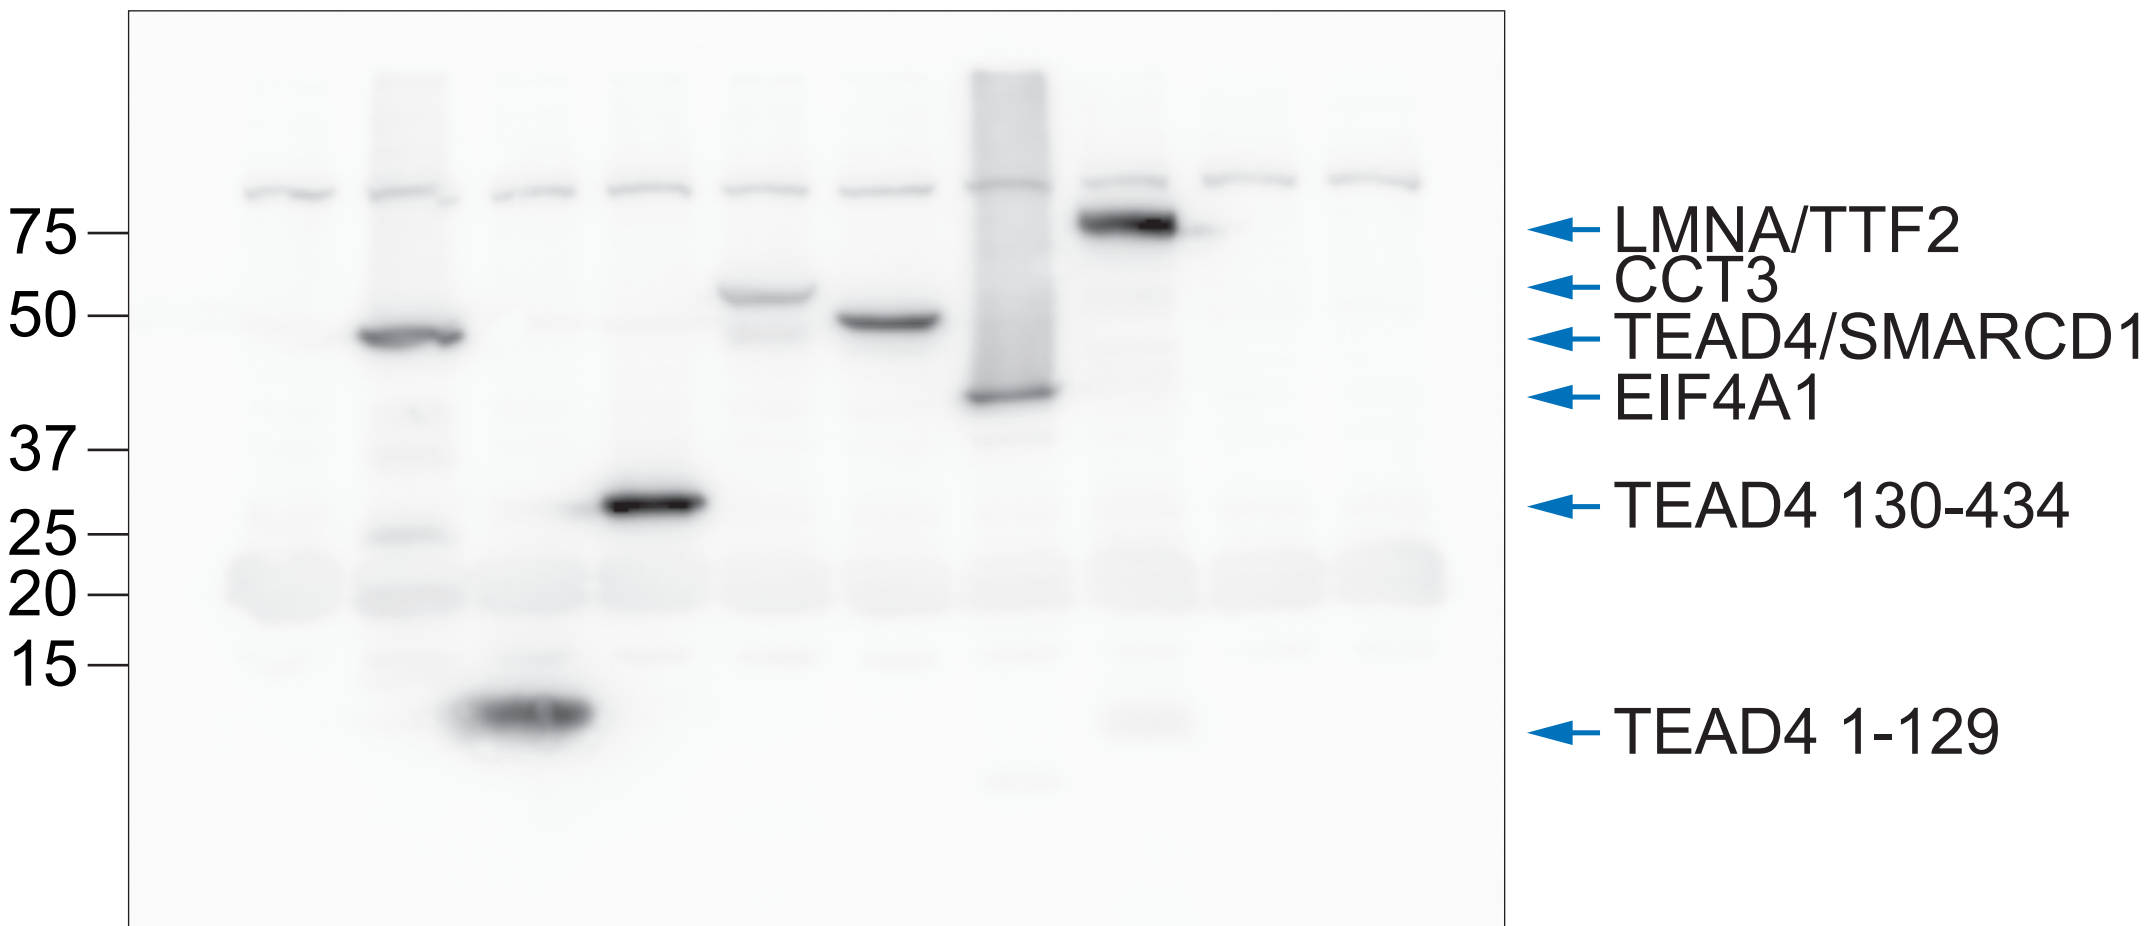

WCL
