# Supplementary figures and images for: SARS-CoV-2 NSP13 interacts with TEAD to suppress Hippo-YAP signaling
Source: eLife journal article supplement (doi:10.7554/elife.100248), 2024-08-21

Figure 2A

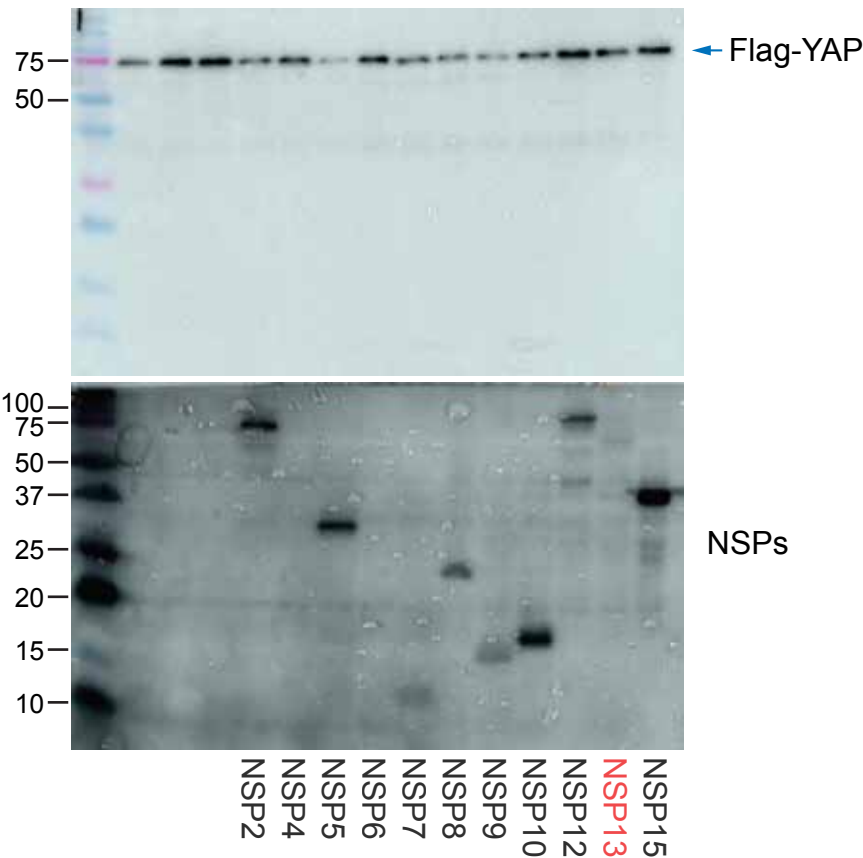

Supplement: fig2-data2 [file Figure 2A.pdf › Figure 2A.pdf]

Figure 2B

150—  
100—  
75—

HA-Lats2/KR

HA-NSP13

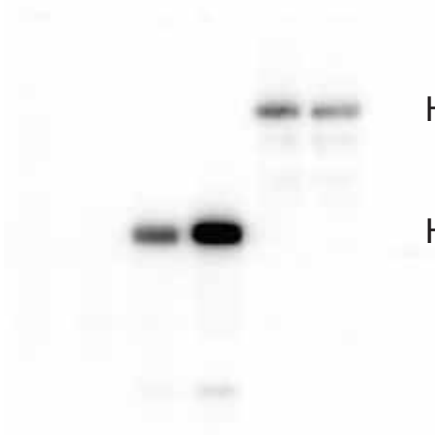

Supplement: fig2-data4 [file Figure 2B.pdf › Figure 2B.pdf]

sFigure 2A

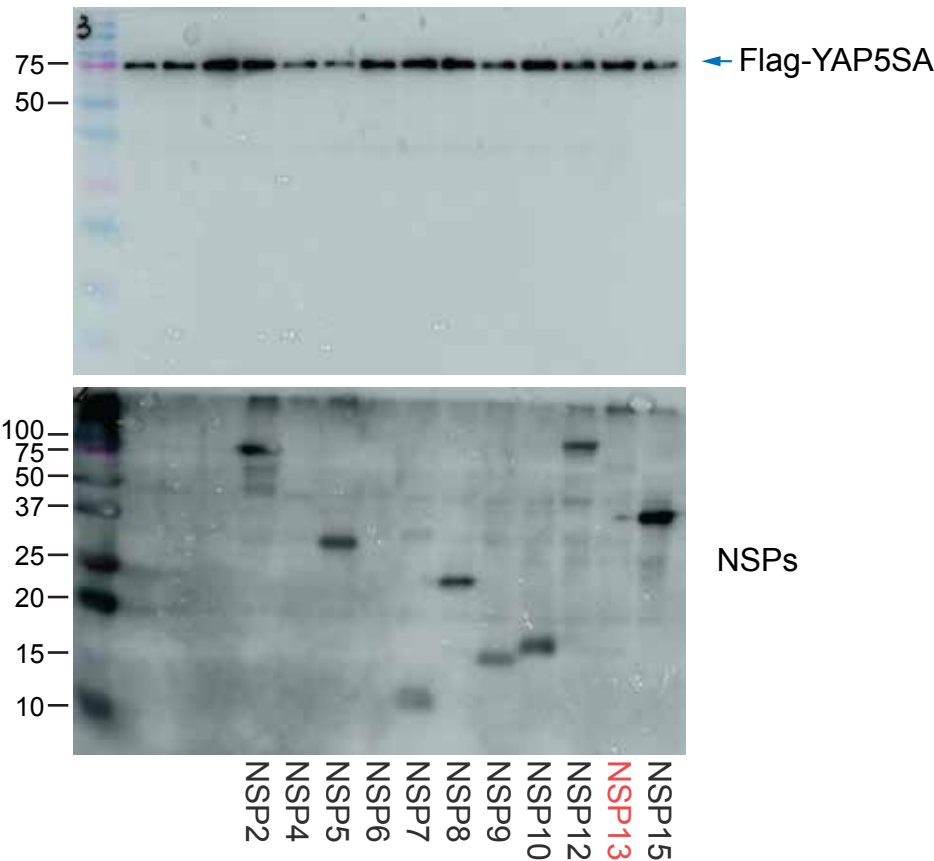

Supplement: fig2-figsupp1-data2 [file sFigure 2A.pdf › sFigure 2A.pdf]

# sFigure 2D

|            |    |   |   |   |    |
|------------|----|---|---|---|----|
| Days PVI   | 12 | 3 | 6 | 9 | 12 |
| AAV9-GFP   | +  | - | - | - | -  |
| AAV9-NSP13 | -  | + | + | + | +  |

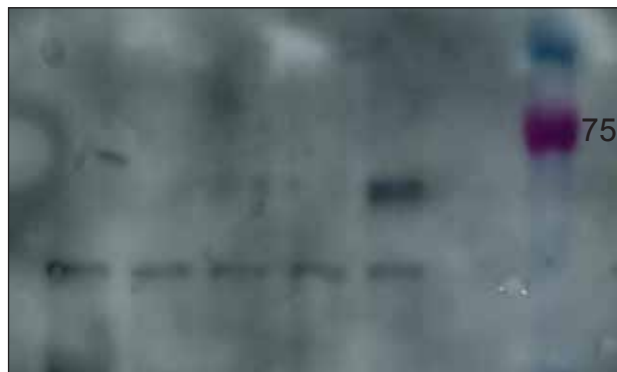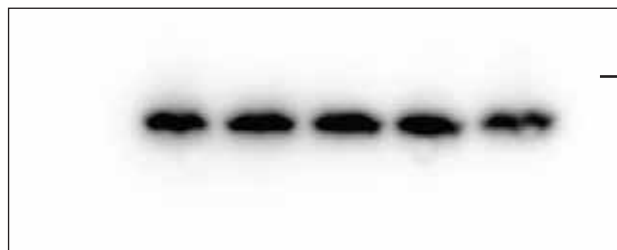

Heart lysis

Supplement: fig2-figsupp4-data2 [file sFigure 2D.pdf › sFigure 2D.pdf]

### Figure 3B

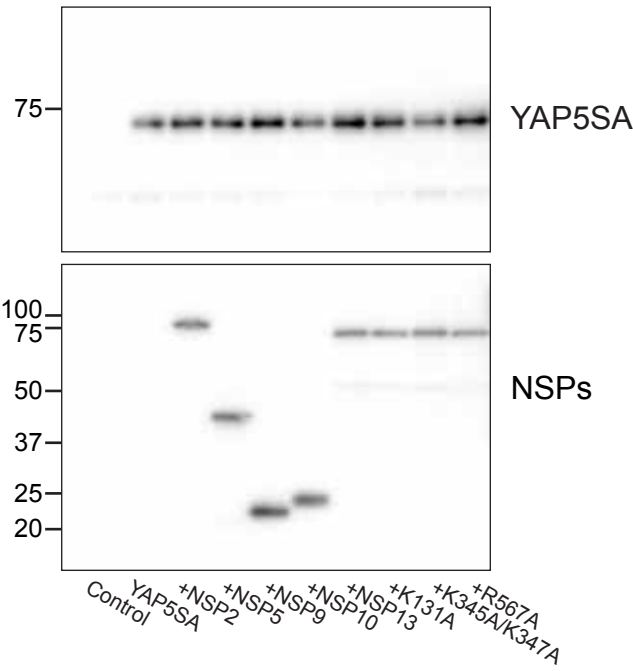

Supplement: fig3-data2 [file Figure 3B.pdf › Figure 3B.pdf]

Figure 3D

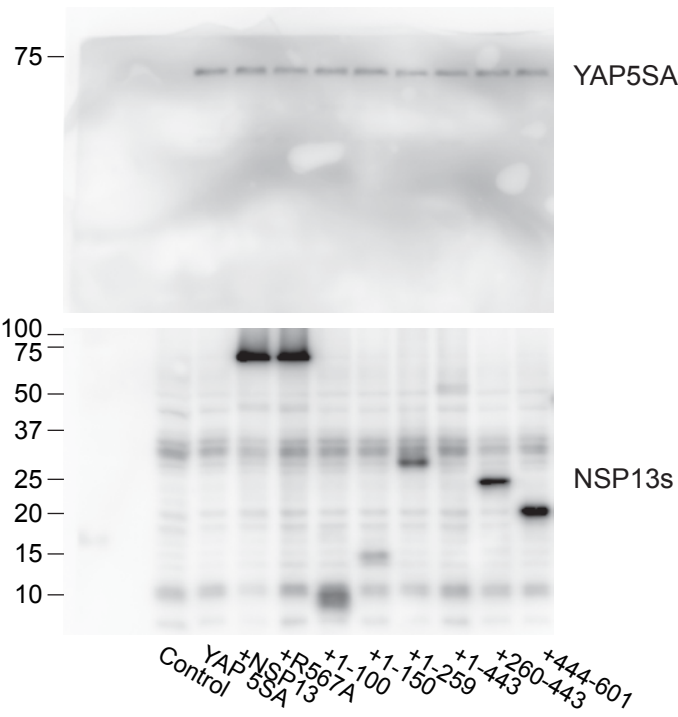

Supplement: fig3-data4 [file Figure 3D.pdf › Figure 3D.pdf]

Figure 4B

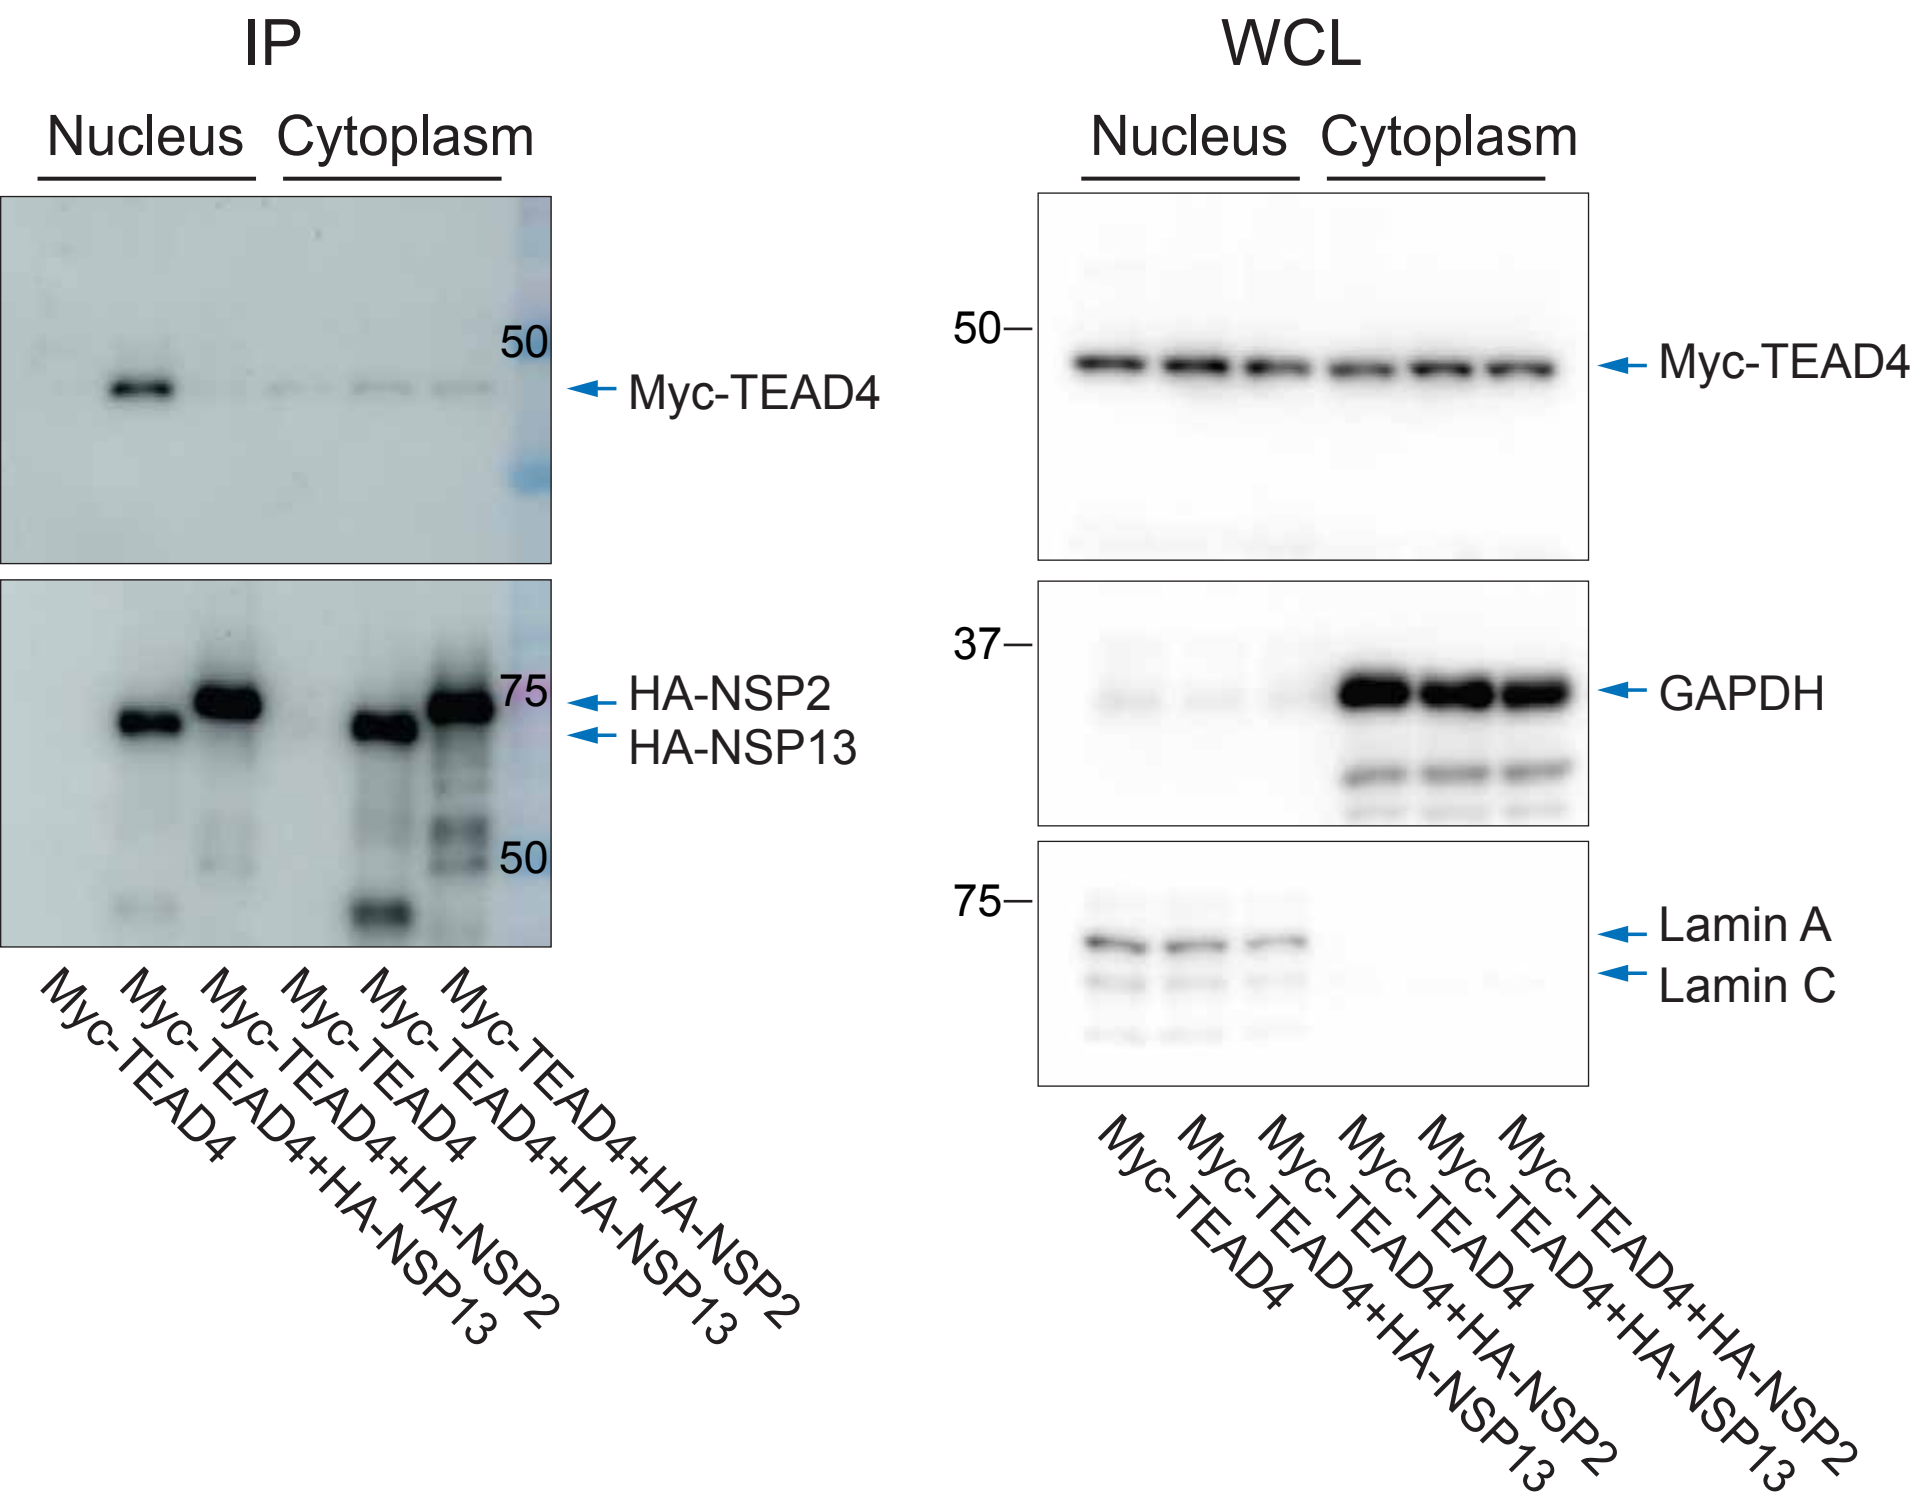

Supplement: fig4-data2 [file Figure 4B.pdf › Figure 4B.pdf]

Figure 4E

|             |   |   |   |   |   |
|-------------|---|---|---|---|---|
| NSP13 virus | - | + | + | + | + |
| TAM (Days)  | 3 | - | - | 3 | 3 |

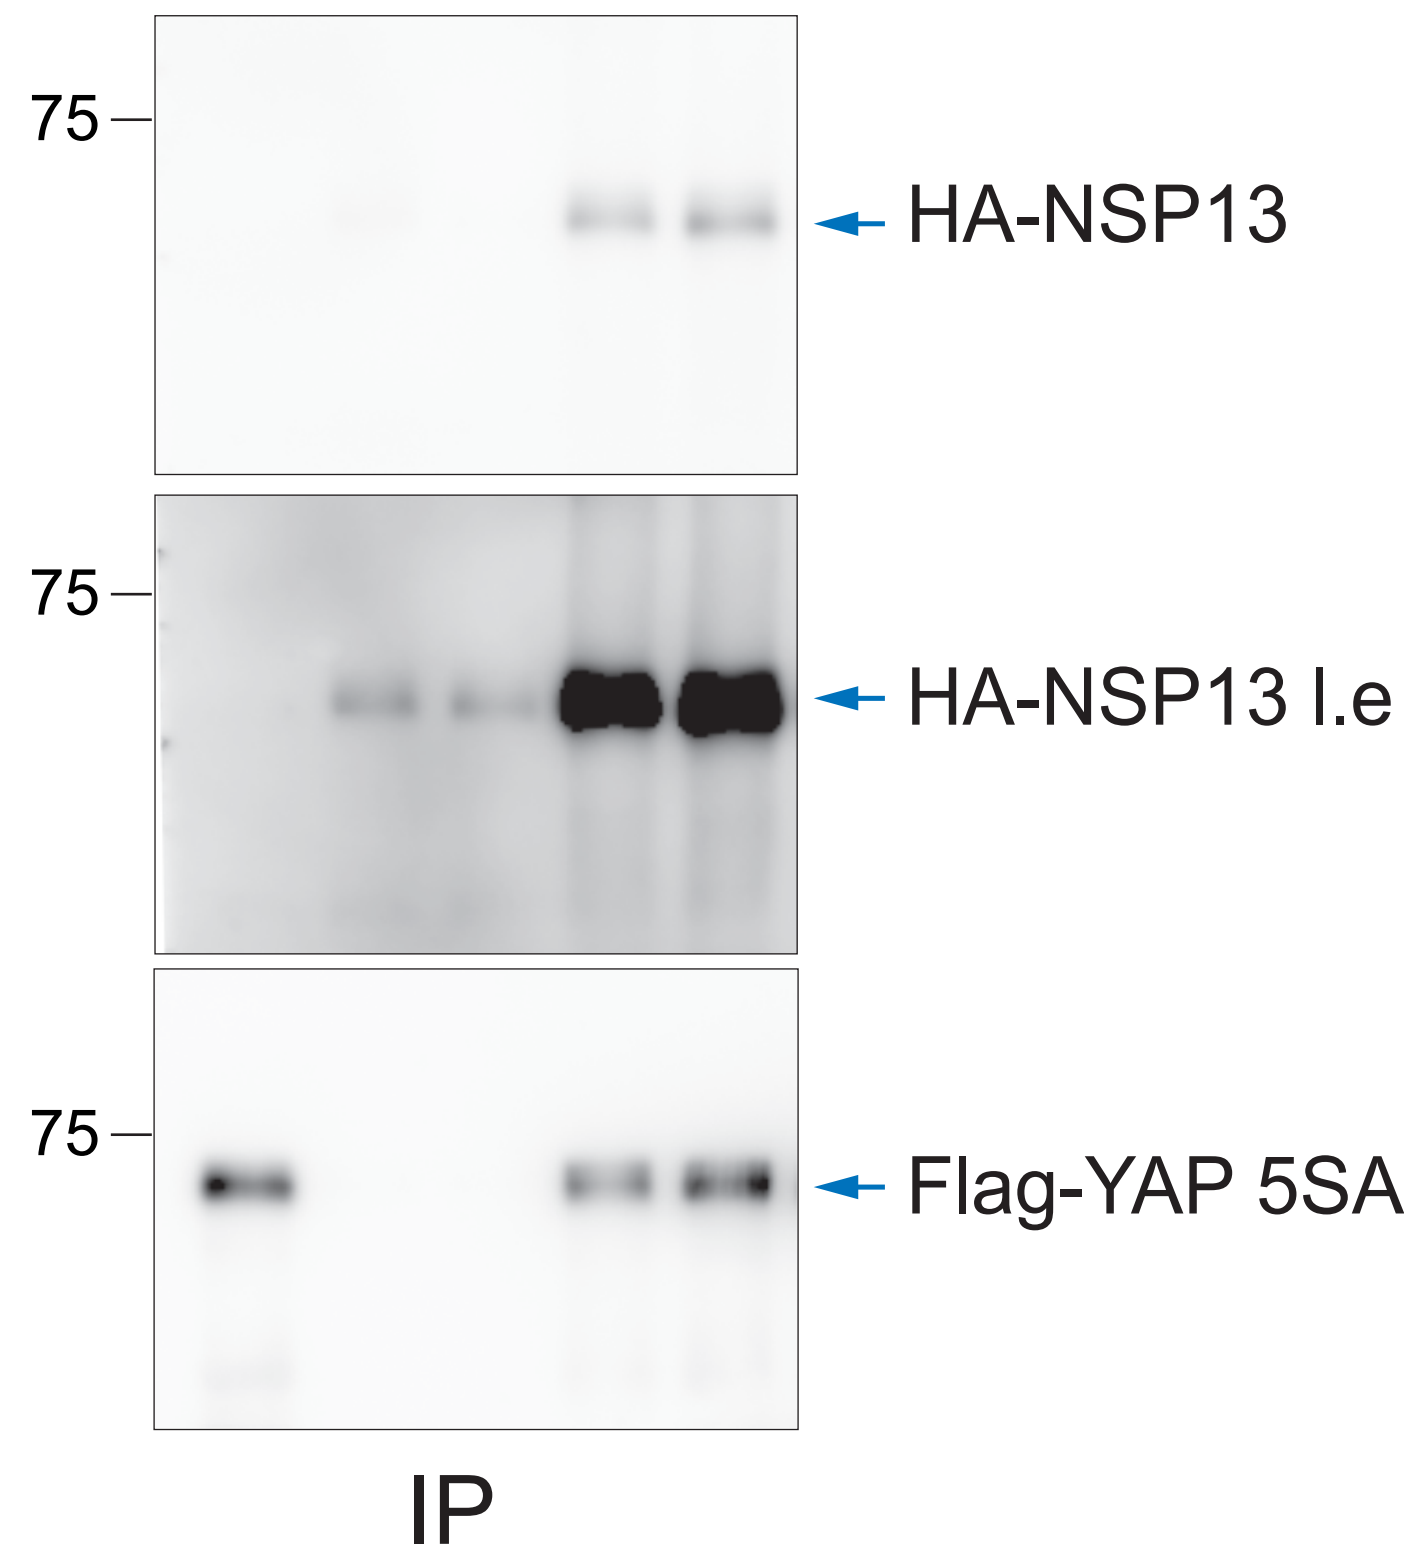

|             |   |   |   |   |   |
|-------------|---|---|---|---|---|
| NSP13 virus | - | + | + | + | + |
| TAM (Days)  | 3 | - | - | 3 | 3 |

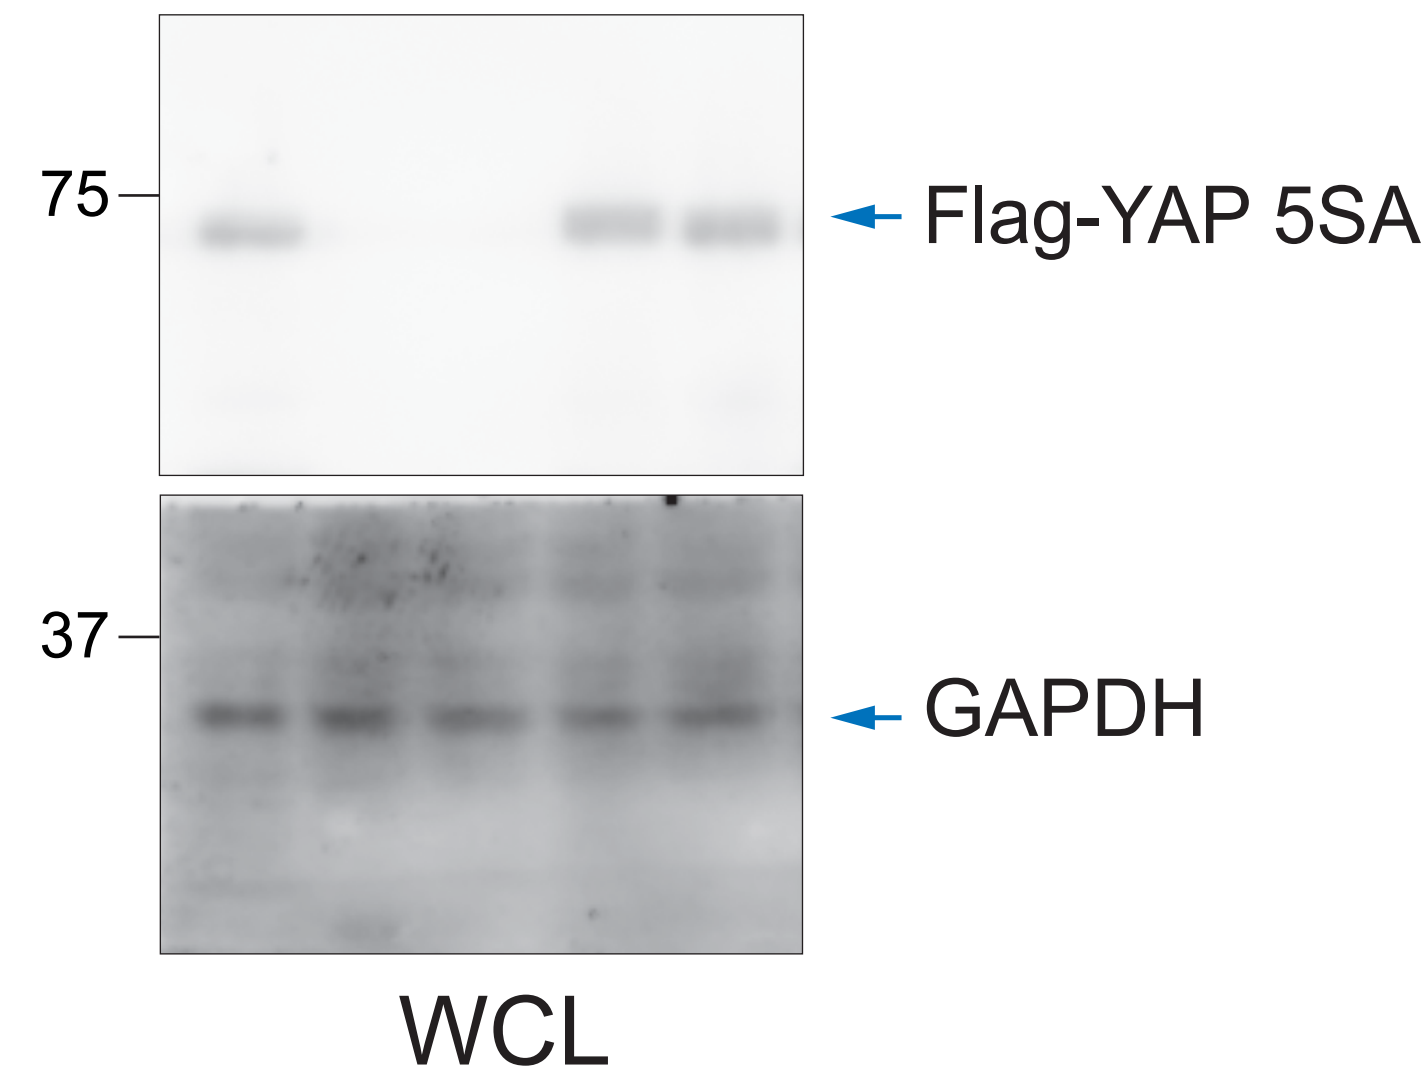

Supplement: fig4-data6 [file Figure 4E.pdf › Figure 4E.pdf]

sFigure 4A

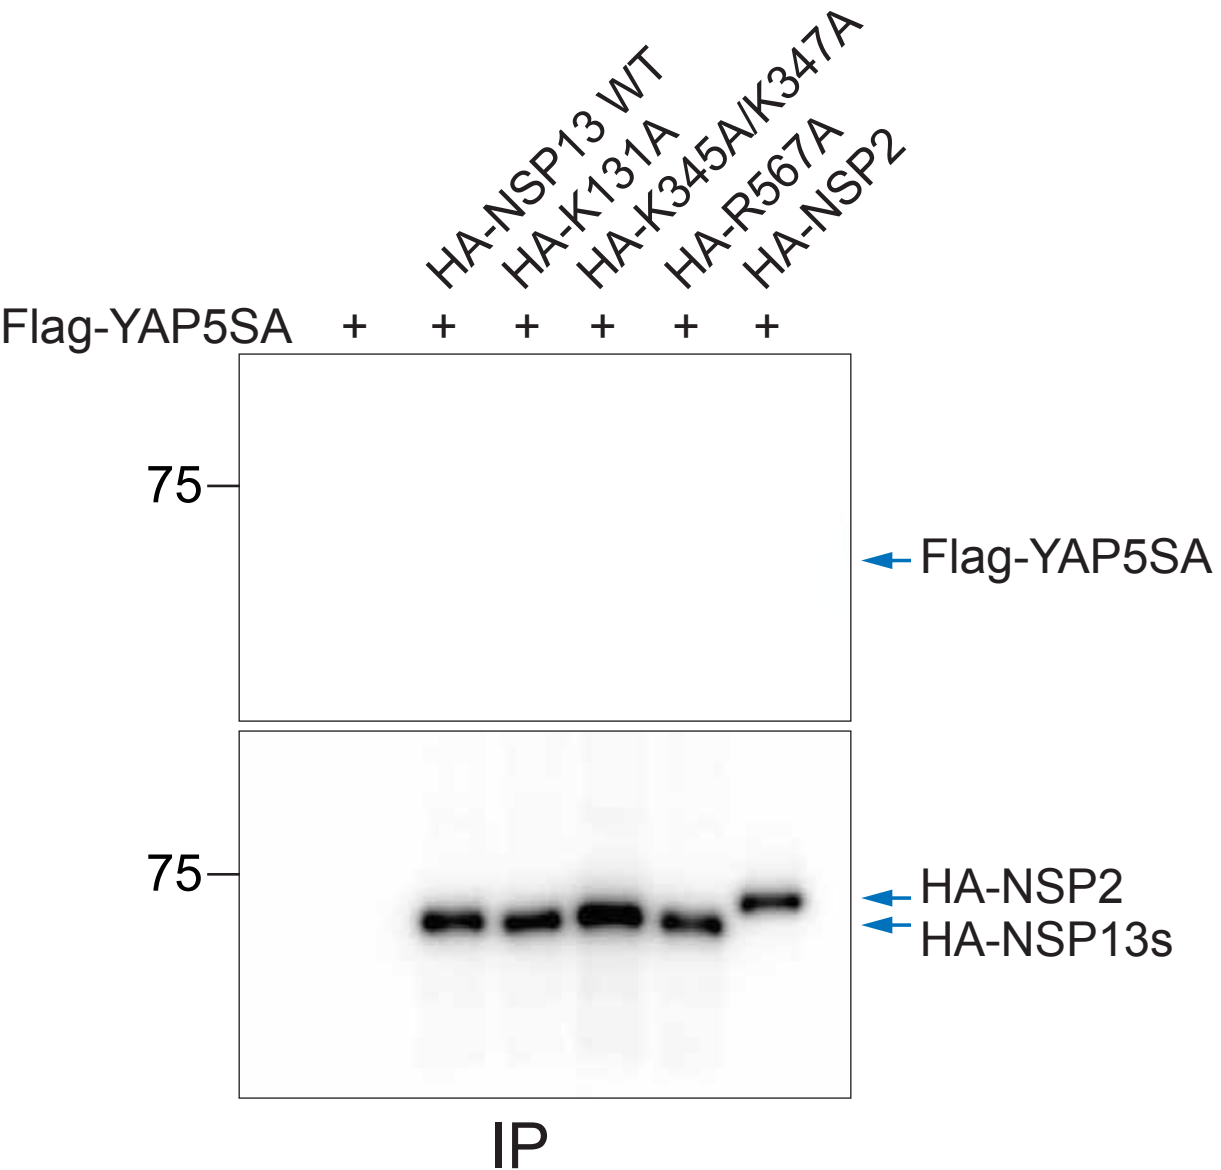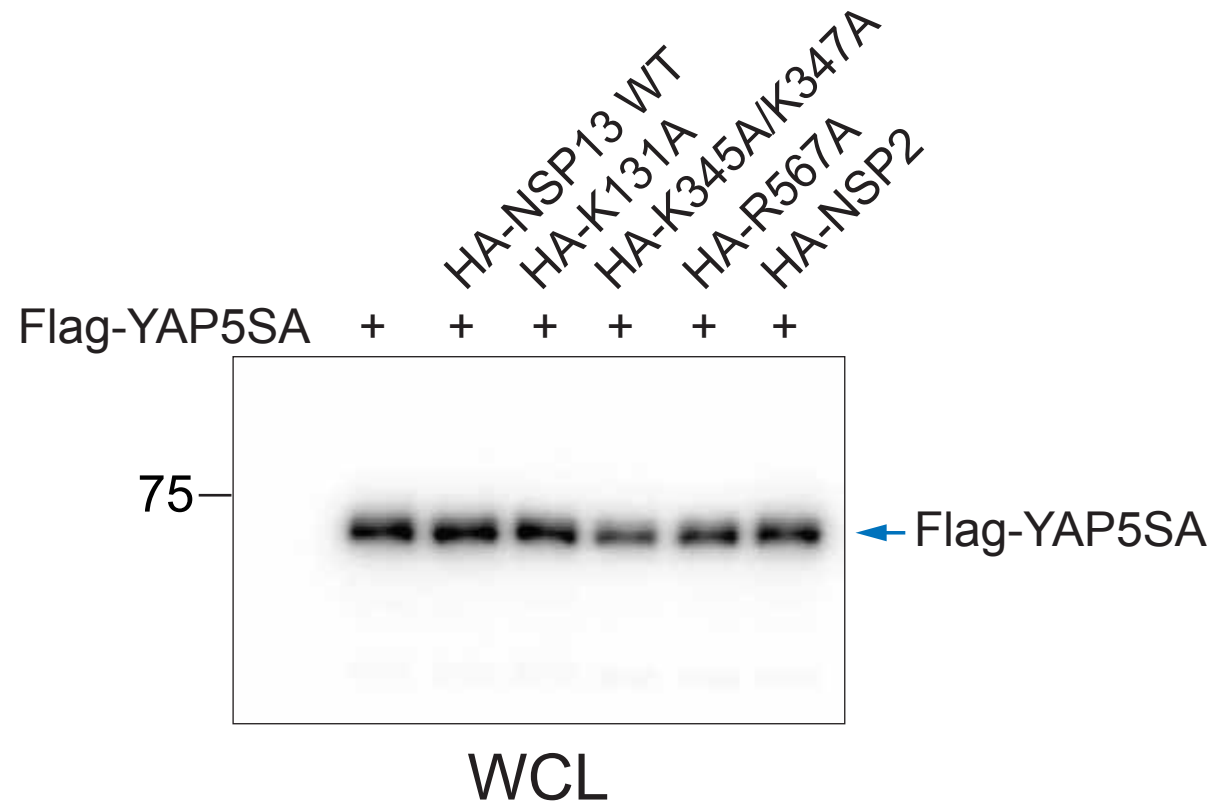

Supplement: fig4-figsupp1-data2 [file sFigure 4A.pdf › sFigure 4A.pdf]

sFigure 4B

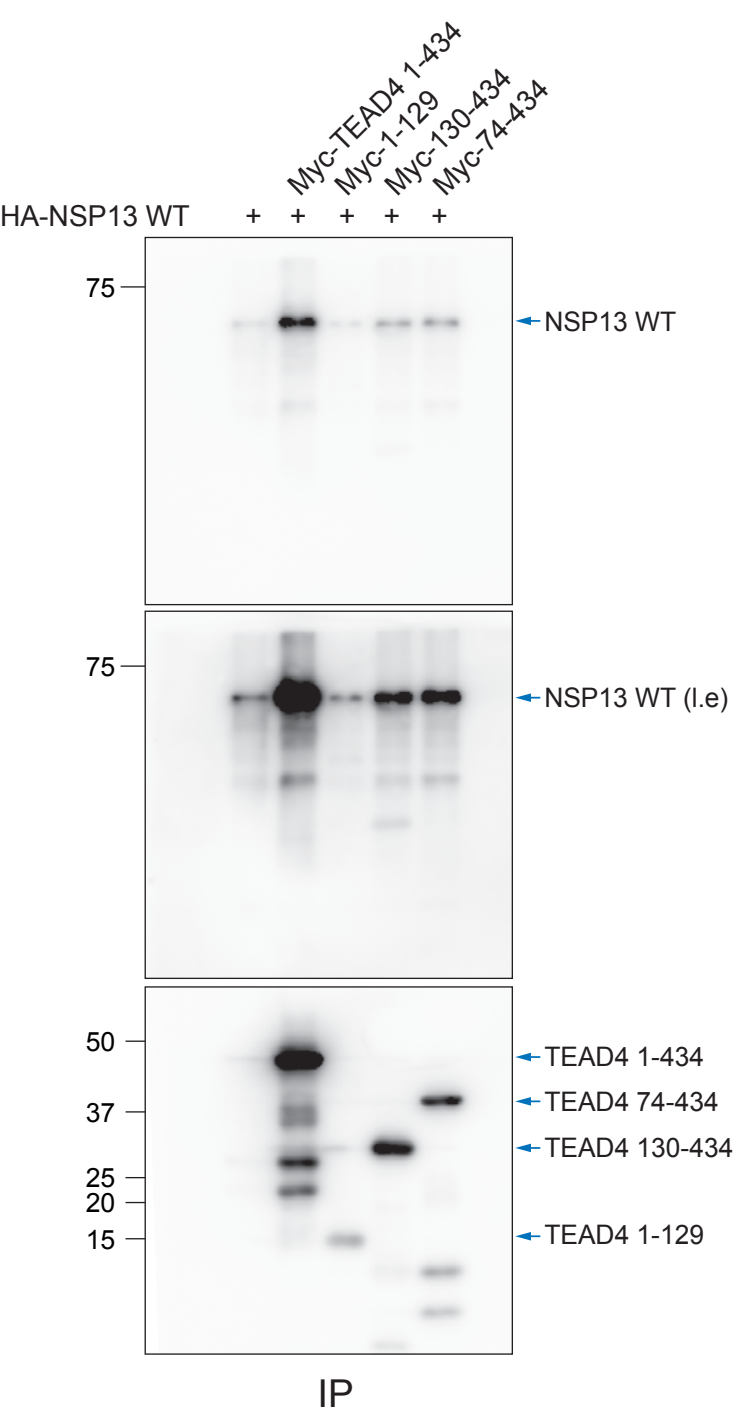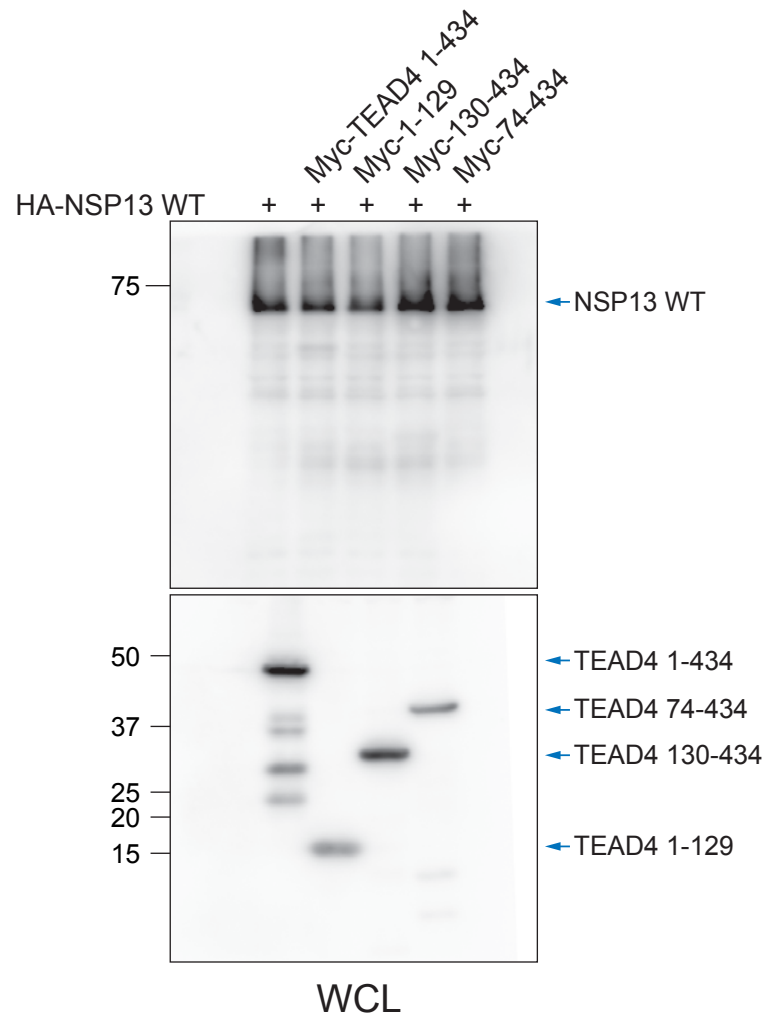

Supplement: fig4-figsupp2-data2 [file sFigure 4B.pdf › sFigure 4B.pdf]

sFigure 4C

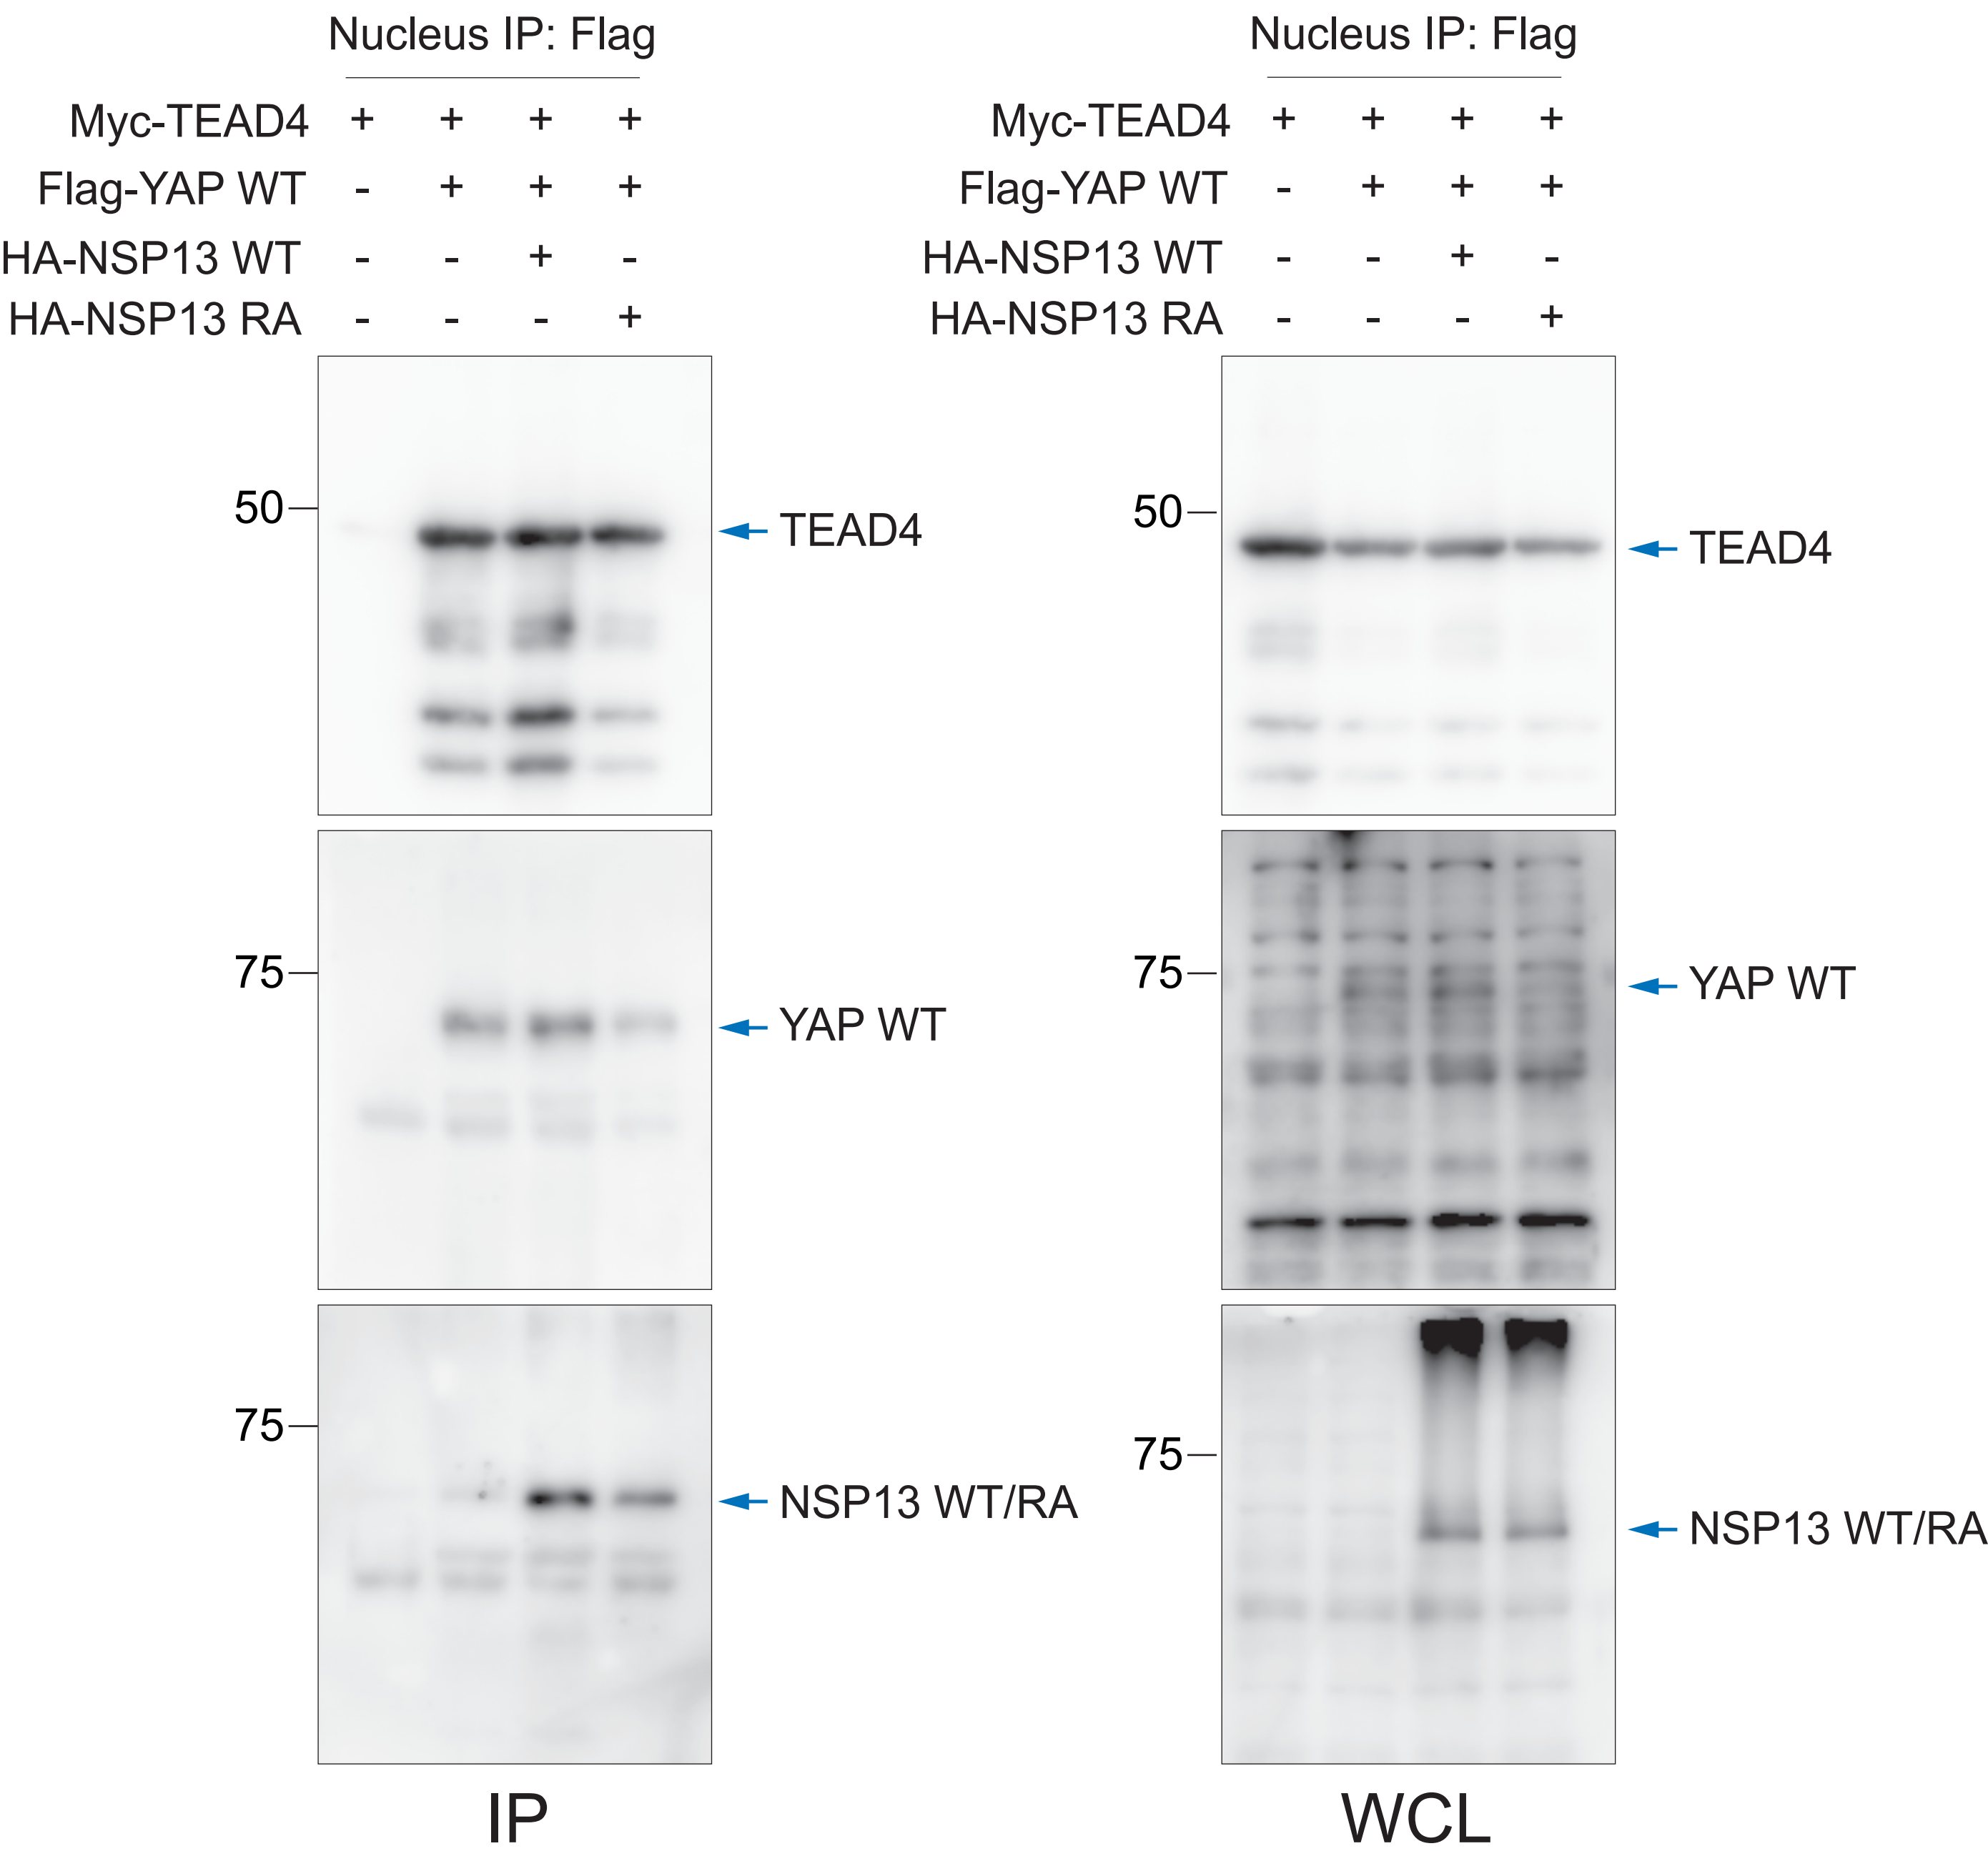

Supplement: fig4-figsupp3-data2 [file sFigure 4C.pdf › sFigure 4C.pdf]

sFigure 4E

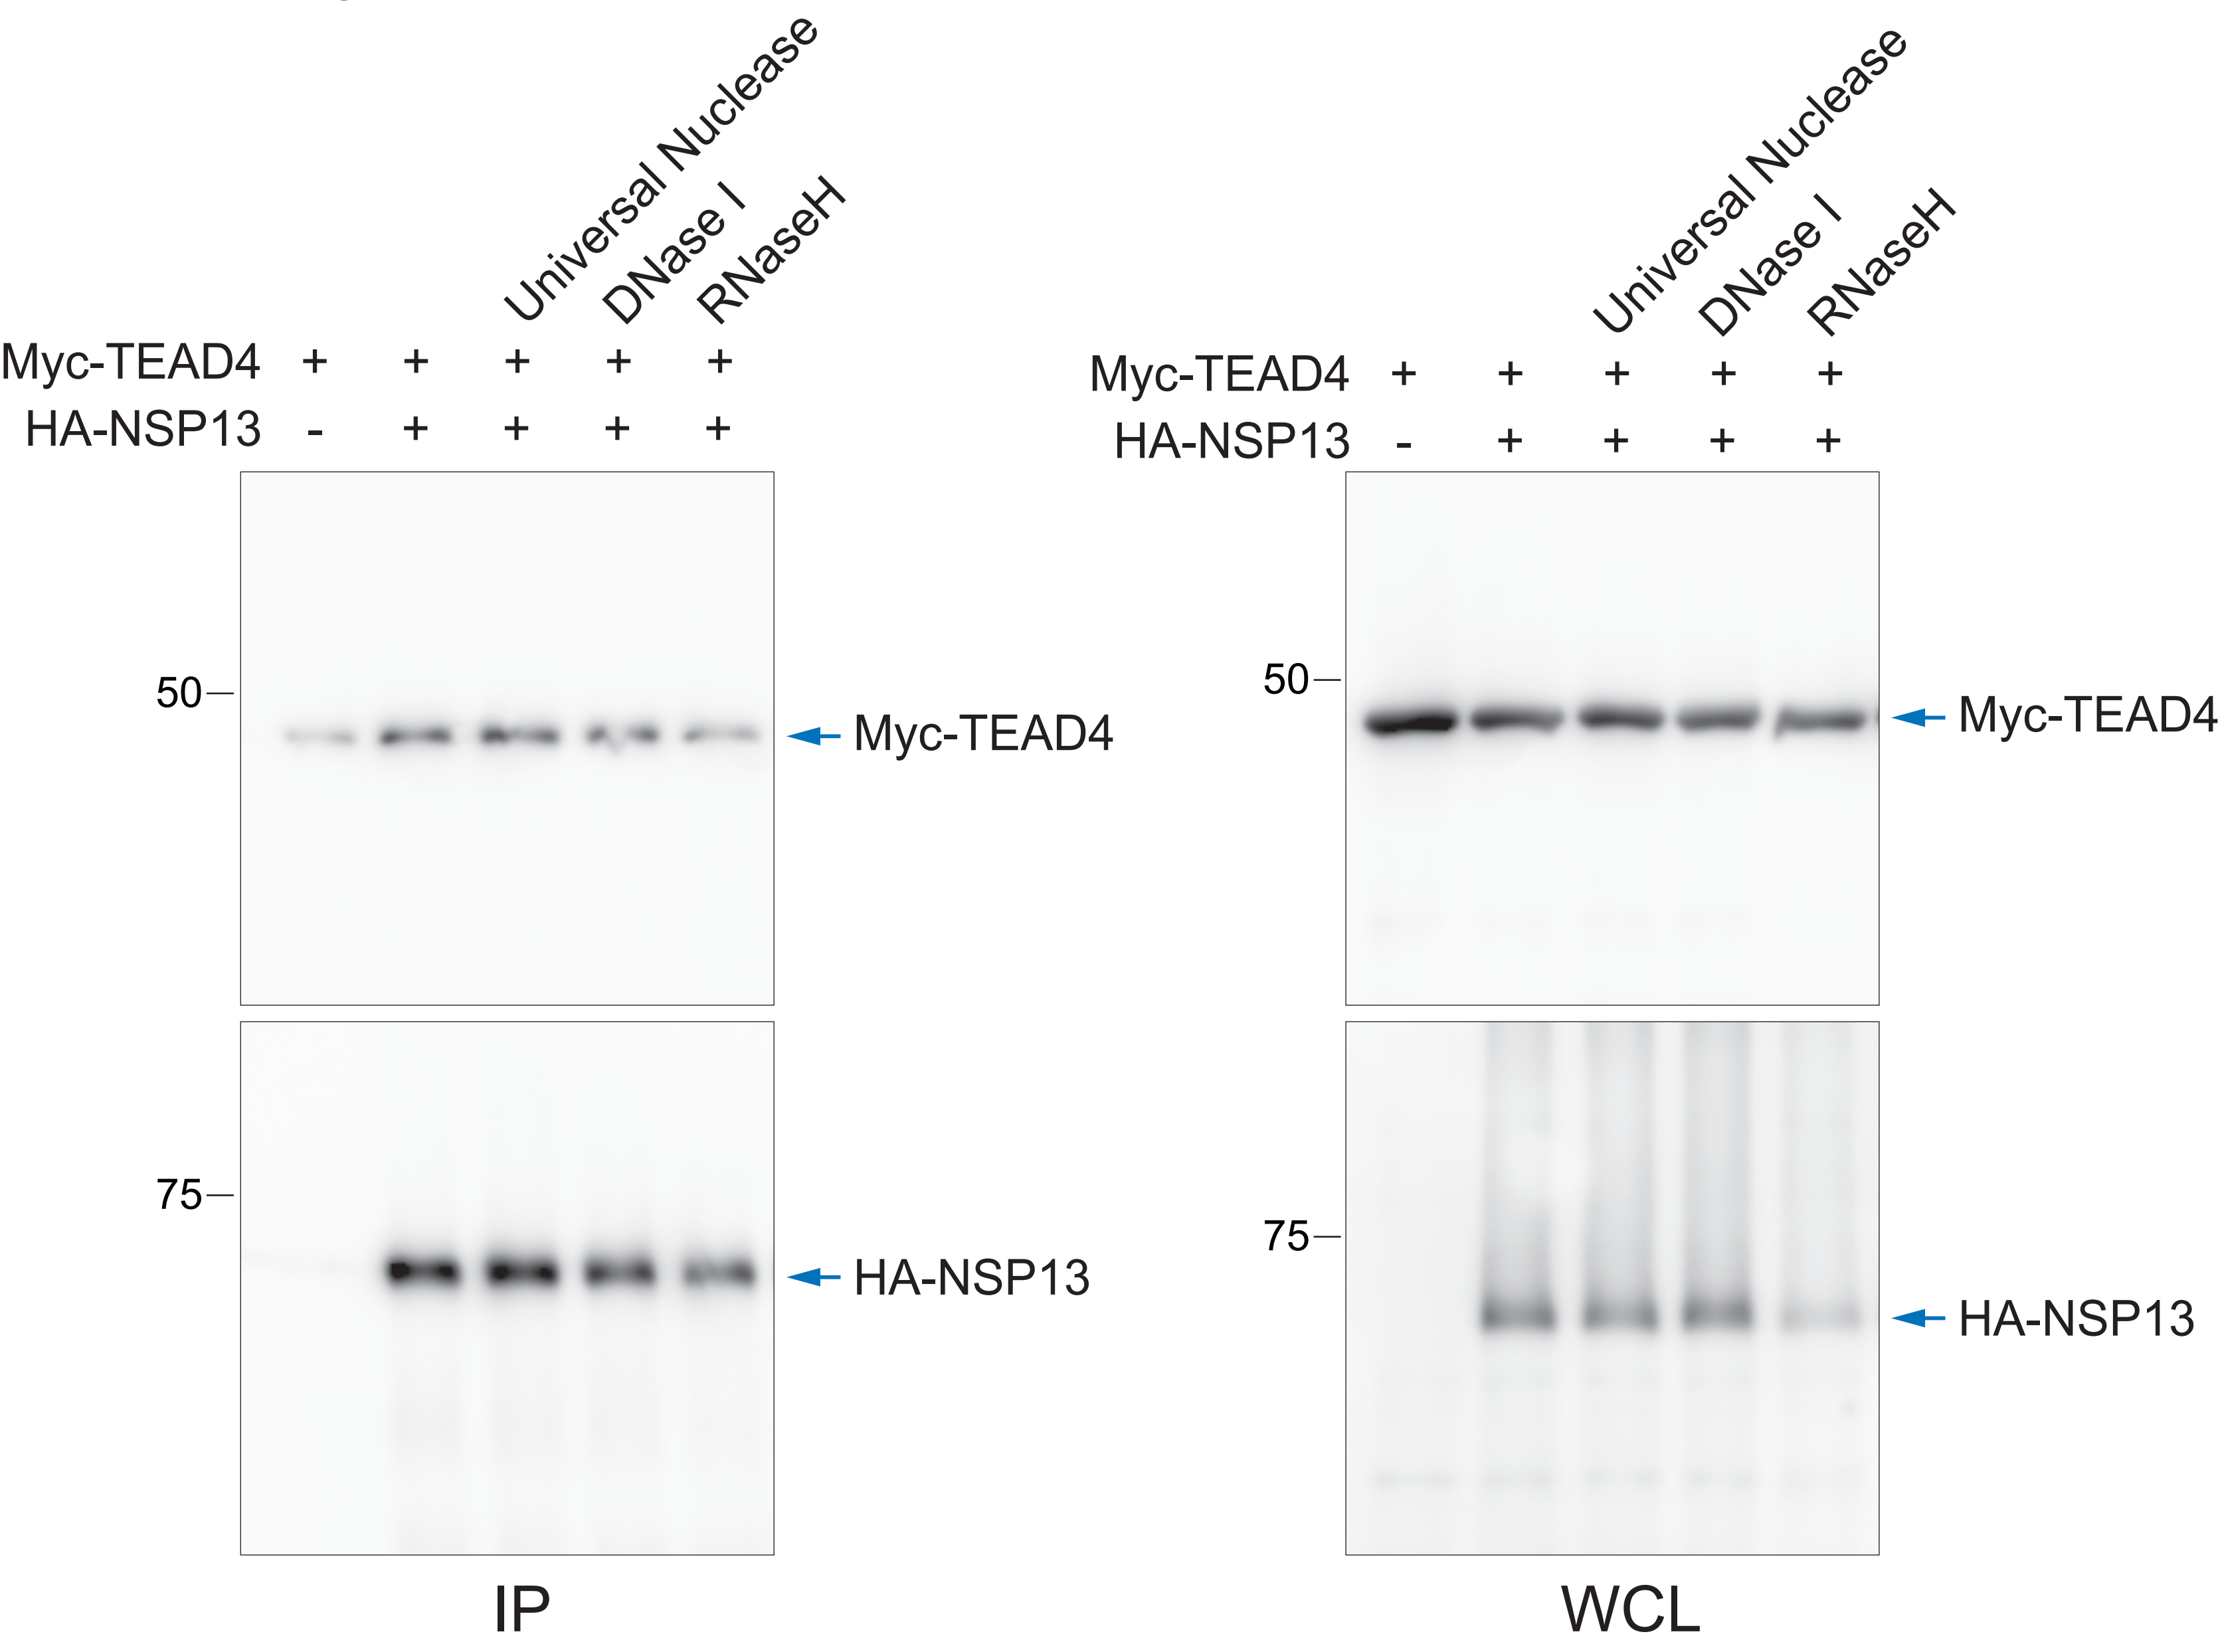

Supplement: fig4-figsupp5-data2 [file sFigure 4E.pdf › sFigure 4E.pdf]
